# Supplementary material for: Role of Inflammatory and Immune-Nutritional Prognostic Markers in Patients Undergoing Surgical Resection for Biliary Tract Cancers
Source: MDPI journal article supplement (doi:10.3390/cancers13143594), 2021-07-18
Supplement: s1 [file s1]

# Supplementary Materials: Role of Inflammatory and Immune-Nutritional Prognostic Markers in Patients Undergoing Surgical Resection for Biliary tract Cancers

Simone Conci, Tommaso Campagnaro, Elisa Danese, Ezio Lombardo, Giulia Isa, Alessandro Vitali, Ivan Marchitelli, Fabio Bagante, Corrado Pedrazzani, Mario De Bellis, Andrea Ciangherotti, Alfredo Guglielmi, Giuseppe Lippi and Andrea Ruzzenente

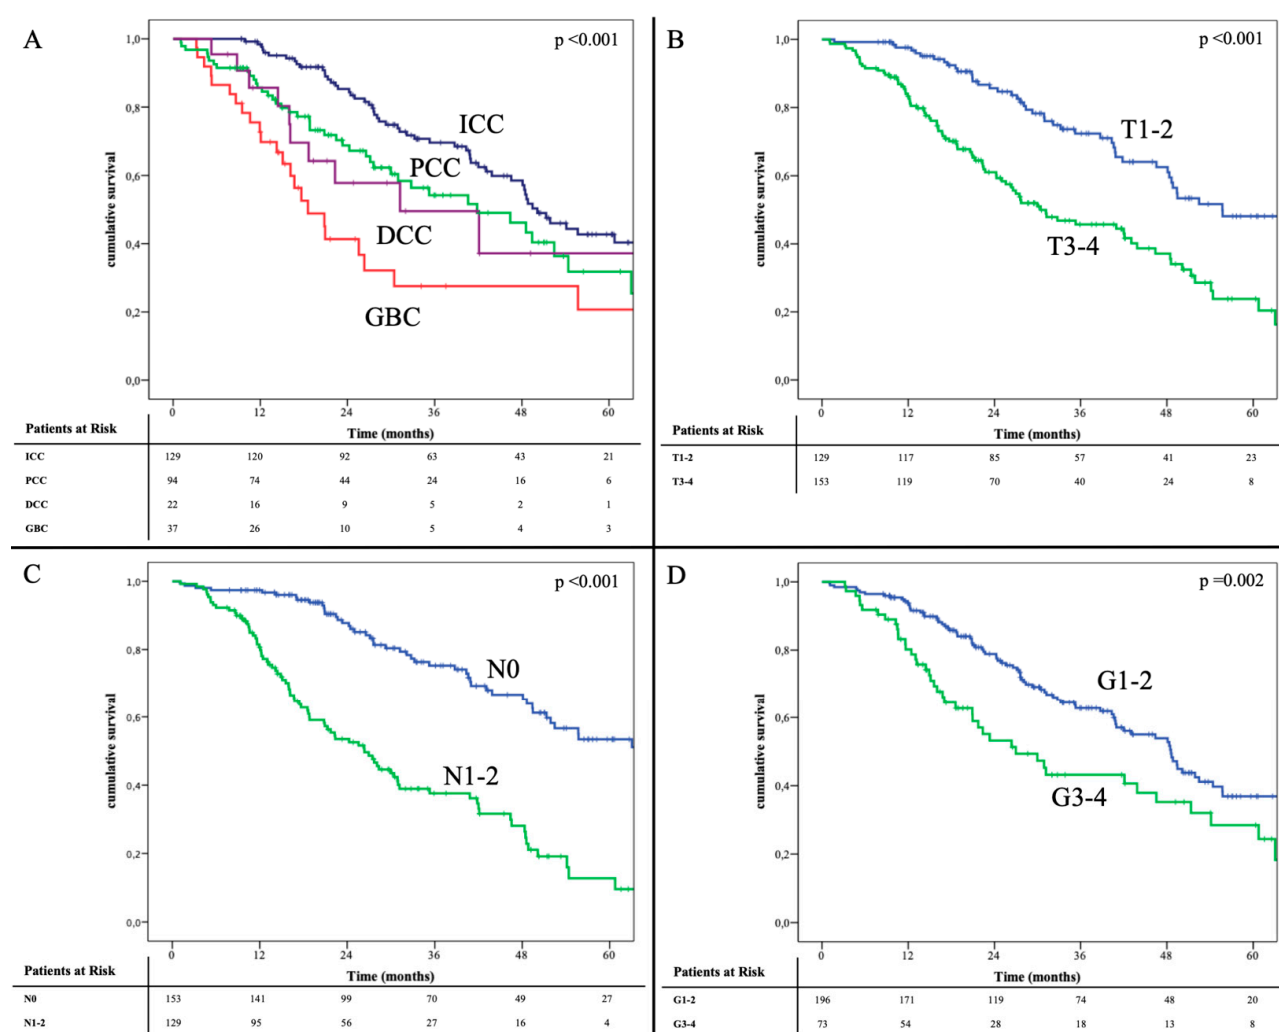

**Figure S1.** Survival curves according to the main clinical and pathological factors: **A.** Type of Biliary Tract Cancer (BTC); **B.** AJCC 8<sup>th</sup>Ed. T Stage; **C.** AJCC 8<sup>th</sup>Ed. N Stage; **D.** Histologic grading. ICC, intrahepatic cholangiocarcinoma; PCC, perihilar cholangiocarcinoma; DCC, distal cholangiocarcinoma; GBC, gallbladder cancer; AJCC, American Joint Committee against Cancer.

**Table S1.** Comparison of Clinical and pathological characteristics according to the type of BTC.

| Characteristics                        |      | ICC<br>n 129      | PCC<br>n 94         | DCC<br>n 22         | GBC<br>n 37       | <i>p</i> Values |
|----------------------------------------|------|-------------------|---------------------|---------------------|-------------------|-----------------|
| Age, years, median (IQR)               |      | 68.9 (59.9–74.4)  | 69.6 (63.4–74.3)    | 75.6 (67.1–78.1)    | 68.1 (61.2–74.7)  | 0.032           |
| Gender, male, <i>n</i> (%)             |      | 73 (56.6)         | 64 (68.1)           | 14 (63.6)           | 16 (43.2)         | 0.057           |
| CA 19-9, U/mL, median (IQR)            |      | 58.0 (15.0–411.0) | 483.0 (91.5–2656.2) | 115.0 (45.0–1304.0) | 302.0 (30–5785.7) | 0.003           |
| Jaundice, <i>n</i> (%)                 |      | 11 (8.5)          | 83 (88.3)           | 19 (86.4)           | 14 (37.8)         | < 0.001         |
| PBD, <i>n</i> (%)                      |      | 8 (6.2)           | 70 (74.5)           | 21 (95.5)           | 14 (37.8)         | < 0.001         |
| Preop Chemotherapy, <i>n</i> (%)       |      | 8 (6.2)           | 3 (3.2)             | 0 (0.0)             | 1 (2.7)           | 0.685           |
| PVE, <i>n</i> (%)                      |      | 2 (1.6)           | 7 (7.4)             | 0 (0.0)             | 0 (0.0)           | 0.086           |
| Tumor size, mm, median (IQR)           |      | 50 (40–70)        | 30 (20–43)          | 20 (10–20)          | 40 (30–60)        | < 0.001         |
| Major hepatectomy, <i>n</i> (%)        |      | 78 (60.4)         | 79 (84.0)           | 0 (0.0)             | 7 (18.9)          | < 0.001         |
| Biliary resection, <i>n</i> (%)        |      | 38 (29.5)         | 94 (100.0)          | 22 (100.0)          | 14 (37.8)         | < 0.001         |
| Vascular resection, <i>n</i> (%)       |      | 5 (3.9)           | 19 (20.2)           | 1 (4.5)             | 3 (8.1)           | 0.001           |
| AJCC 8th T Stage,<br><i>n</i> (%)      | T1–2 | 77 (59.7)         | 40 (42.6)           | 1 (4.5)             | 11 (29.7)         | < 0.001         |
|                                        | T3–4 | 52 (40.3)         | 54 (57.4)           | 21 (95.5)           | 26 (70.3)         |                 |
| AJCC 8th N Stage,<br><i>n</i> (%)      | N0   | 88 (68.2)         | 45 (47.9)           | 7 (31.8)            | 13 (35.1)         | < 0.001         |
|                                        | N1–2 | 41 (31.8)         | 49 (52.1)           | 15 (68.2)           | 24 (64.9)         |                 |
| Histologic grad-<br>ing, <i>n</i> (%)  | G1–2 | 98 (76.0)         | 68 (72.3)           | 10 (45.5)           | 20 (54.0)         | 0.004           |
|                                        | G3–4 | 29 (22.5)         | 19 (20.3)           | 12 (54.5)           | 13 (35.2)         |                 |
|                                        | n/a  | 2 (1.5)           | 7 (7.4)             | 0 (0.0)             | 4 (10.8)          |                 |
| Macrovascular invasion, <i>n</i> (%)   |      | 19 (14.7)         | 43 (45.7)           | 3 (13.6)            | 9 (24.3)          | < 0.001         |
| Microvascular invasion, <i>n</i> (%)   |      | 78 (60.5)         | 78 (83.0)           | 14 (63.6)           | 29 (78.4)         | 0.010           |
| Radicality, <i>n</i> (%)               | R0   | 89 (69.0)         | 62 (66.0)           | 15 (68.2)           | 27 (73.0)         | 0.883           |
|                                        | R1   | 40 (31.0)         | 32 (34.0)           | 7 (31.8)            | 10 (27.0)         |                 |
| Severe Morbidity, <i>n</i> (%)         |      | 23 (17.8)         | 29 (30.9)           | 4 (18.2)            | 6 (16.2)          | 0.048           |
| Post-operative mortality, <i>n</i> (%) |      | 0 (0.0)           | 3 (3.2)             | 0 (0.0)             | 2 (5.4)           | 0.016           |
| Hospital stay, days, median (IQR)      |      | 8 (7–13)          | 16 (12–27)          | 18 (14–35)          | 9 (5–24)          | < 0.001         |
| Postop Chemotherapy, <i>n</i> (%)      |      | 101 (78.3)        | 48 (51.1)           | 14 (63.6)           | 18 (48.6)         | < 0.001         |

ICC; intrahepatic cholangiocarcinoma; PCC; peri-hilar cholangiocarcinoma; DCC; distal cholangiocarcinoma; GBC, gallbladder cancer; IQR, interquartile range; PBD, preoperative biliary drainage; PVE, portal vein embolization;

**Table S2.** Comparison of distribution of Inflammatory-based and nutritional prognostic scores according to the type of BTC.

| Prognostic Score   |   | ICC<br>n 129        | PCC<br>n 94         | DCC<br>n 22        | GBC<br>n 37         | p values |
|--------------------|---|---------------------|---------------------|--------------------|---------------------|----------|
| GPS, <i>n</i> (%)  | 0 | 111 (86.1)          | 44 (46.8)           | 13 (59.1)          | 24 (64.9)           | <0.001   |
|                    | 1 | 16 (12.4)           | 32 (34.0)           | 4 (18.2)           | 11 (29.7)           |          |
|                    | 2 | 2 (1.5)             | 18 (19.1)           | 5 (22.7)           | 2 (5.4)             |          |
| mGPS, <i>n</i> (%) | 0 | 114 (84.4)          | 60 (63.8)           | 14 (63.6)          | 26 (70.3)           | <0.001   |
|                    | 1 | 13 (10.1)           | 16 (17.1)           | 3 (13.7)           | 9 (24.3)            |          |
|                    | 2 | 2 (1.5)             | 18 (19.1)           | 5 (22.7)           | 2 (5.4)             |          |
| PI, <i>n</i> (%)   | 0 | 104 (80.6)          | 58 (61.7)           | 13 (59.1)          | 25 (67.6)           | 0.015    |
|                    | 1 | 14 (10.1)           | 29 (30.9)           | 7 (31.8)           | 8 (21.6)            |          |
|                    | 2 | 11 (8.5)            | 7 (7.4)             | 2 (9.1)            | 4 (10.8)            |          |
| NLR, median (IQR)  |   | 2.71 (1.97–3.89)    | 3.29 (2.47–4.56)    | 3.06 (1.69–4.13)   | 3.14 (1.96–3.76)    | 0.026    |
| PLR, median (IQR)  |   | 147.0 (110.2–180.5) | 198.9 (136.9–275.7) | 135.8 (95.9–214.2) | 148.5 (116.4–190.5) | 0.001    |
| LMR, median (IQR)  |   | 3.46 (2.56–4.90)    | 2.98 (1.97–4.12)    | 3.19 (2.39–3.81)   | 3.55 (2.33–5.27)    | 0.197    |
| PNI, median (IQR)  |   | 52.4 (47.7–55.1)    | 45.1 (39.6–49.5)    | 47.3 (41.7–51.3)   | 49.8 (44.8–53.5)    | <0.001   |

GPS, Glasgow Prognostic Score; mGPS, modified Glasgow Prognostic Score; PI, Prognostic Index; NLR, neutrophil to lymphocyte ratio; PLR, platelet to lymphocyte ratio; LMR, lymphocyte to monocyte ratio; PNI, prognostic nutritional index.

**Table S3.** Mortality according to the different inflammatory and immune-nutritional markers. GPS, Glasgow Prognostic Score; mGPS, modified Glasgow Prognostic Score; PI, Prognostic Index; NLR, neutrophil to lymphocyte ratio; PLR, platelet to lymphocyte ratio; LMR, lymphocyte to monocyte ratio; PNI, prognostic nutritional index.

| Prognostic Marker |        | Univariate Analysis |          | Logistic regression |              |          |
|-------------------|--------|---------------------|----------|---------------------|--------------|----------|
|                   |        | n (%)               | p values | OR                  | 95% C.I.     | p values |
| GPS               | 0      | 1/192 (0.5)         | 0.037    | 8.884               | 0.978–20.661 | 0.052    |
|                   | 1–2    | 4/90 (4.4)          |          |                     |              |          |
| mGPS              | 0      | 2/214 (0.9)         | 0.093    | 4.892               | 0.800–19.913 | 0.086    |
|                   | 1–2    | 3/68 (4.4)          |          |                     |              |          |
| PI                | 0      | 2/200 (1.0)         | 0.149    | 3.759               | 0.616–22.929 | 0.151    |
|                   | 1–2    | 3/82 (3.7)          |          |                     |              |          |
| NLR               | <3.13  | 3/146 (2.1)         | 0.533    | 0.711               | 0.117–4.324  | 0.712    |
|                   | ≥3.13  | 2/136 (1.5)         |          |                     |              |          |
| PLR               | <178.2 | 3/174 (1.7)         | 0.635    | 1.075               | 0.177–6.542  | 0.937    |
|                   | ≥178.2 | 2/108 (1.9)         |          |                     |              |          |
| LMR               | ≥3.47  | 3/126 (2.4)         | 0.400    | 0.532               | 0.088–3.237  | 0.494    |
|                   | <3.47  | 2/156 (1.3)         |          |                     |              |          |
| PNI               | ≥48.6  | 1/154 (0.6)         | 0.018    | 8.547               | 1.876–13.789 | 0.005    |
|                   | <48.6  | 4/128 (3.1)         |          |                     |              |          |
